# Supplementary material for: ATP-Triggered Conformational Changes Delineate Substrate-Binding and -Folding Mechanics of the GroEL Chaperonin
Source: PubMed Central journal article supplement (PMC3326522; doi:10.1016/j.cell.2012.02.047), 2012-03-30
Supplement: mmc1.pdf [file mmc1.pdf]

**Table S1. Domain rotations and translations, related to Figures 4 and 5.**

A.

**Singly-bound top ring**

| GroEL-ATP <sub>7</sub> conformations |         | Translation<br>(Å) | Rotation<br>(degrees) | Rotation axis |      |      |
|--------------------------------------|---------|--------------------|-----------------------|---------------|------|------|
|                                      |         |                    |                       | x             | y    | z    |
| <b>Apical domains</b>                |         |                    |                       |               |      |      |
| <i>Proposed trajectory</i>           |         |                    |                       |               |      |      |
| Apo                                  | Rs1     | 13.8               | 36.9                  | 0.4           | -0.6 | 0.7  |
| Rs1                                  | Rs2     | 3.0                | 8.9                   | 1.0           | 0.1  | -0.2 |
| Rs2                                  | Rs-open | 10.3               | 17.7                  | 0.1           | 0.4  | -0.9 |
| Rs-open                              | R-ES    | 7.6                | 95.6                  | -0.5          | 0.9  | -0.2 |
| <b>Intermediate domains</b>          |         |                    |                       |               |      |      |
| <i>Proposed trajectory</i>           |         |                    |                       |               |      |      |
| Apo                                  | Rs1     | 11.7               | 35.3                  | 0.4           | -0.6 | 0.7  |
| Rs1                                  | Rs2     | 1.8                | 2.7                   | -0.8          | 0.5  | -0.4 |
| Rs2                                  | Rs-open | 1.7                | 6.3                   | -0.2          | -0.8 | 0.5  |
| Rs-open                              | R-ES    | 4.5                | 14.6                  | 0.8           | 0.6  | -0.3 |
| <b>Equatorial domains</b>            |         |                    |                       |               |      |      |
| <i>Proposed trajectory</i>           |         |                    |                       |               |      |      |
| Apo                                  | Rs1     | 2.0                | 8.4                   | 1.0           | 0.1  | 0.1  |
| Rs1                                  | Rs2     | 0.8                | 2.8                   | -1.0          | 0.0  | -0.1 |
| Rs2                                  | Rs-open | 1.6                | 2.8                   | 0.3           | -1.0 | -0.1 |
| Rs-open                              | R-ES    | 5.2                | 7.4                   | 0.0           | 0.8  | -0.6 |

B.

**Double-bound top ring**

| GroEL-ATP <sub>14</sub><br>conformations | Translation<br>(Å) | Rotation<br>(degrees) | Rotation axis |   |   |
|------------------------------------------|--------------------|-----------------------|---------------|---|---|
|                                          |                    |                       | x             | y | z |
| <b>Apical domains</b>                    |                    |                       |               |   |   |
| <i>Proposed trajectory</i>               |                    |                       |               |   |   |

|         |         |      |       |      |      |      |
|---------|---------|------|-------|------|------|------|
| Apo     | Rd1     | 8.8  | 40.8  | -0.4 | -0.6 | -0.7 |
| Rd1     | Rd2     | 5.1  | 8.0   | 0.6  | -0.4 | 0.7  |
| Rd2     | Rd-open | 13.7 | 24.4  | -0.7 | -0.7 | -0.2 |
| Rd-open | R-ES    | 6.9  | 107.6 | -0.1 | 0.5  | 0.8  |

### Intermediate domains

#### *Proposed trajectory*

|         |         |     |      |      |      |      |
|---------|---------|-----|------|------|------|------|
| Apo     | Rd1     | 6.7 | 36.5 | -0.3 | -0.6 | -0.7 |
| Rd1     | Rd2     | 1.8 | 3.4  | 0.9  | -0.2 | -0.4 |
| Rd2     | Rd-open | 1.7 | 2.6  | -0.2 | 0.5  | 0.9  |
| Rd-open | R-ES    | 2.0 | 11.4 | 0.7  | -0.1 | 0.7  |

### Equatorial domains

#### *Proposed trajectory*

|         |         |     |     |      |      |      |
|---------|---------|-----|-----|------|------|------|
| Apo     | Rd1     | 0.5 | 6.4 | 0.5  | 0.8  | -0.3 |
| Rd1     | Rd2     | 0.8 | 2.1 | 0.2  | -0.5 | 0.9  |
| Rd2     | Rd-open | 1.0 | 4.7 | 0.0  | -0.3 | -1.0 |
| Rd-open | R-ES    | 0.4 | 5.2 | -0.3 | 0.5  | 0.8  |

### Double-bound bottom ring

### Apical domains

#### *Proposed trajectory*

|     |      |     |      |      |      |      |
|-----|------|-----|------|------|------|------|
| Apo | Rd3  | 7.3 | 29.3 | 0.3  | -0.6 | 0.7  |
| Rd3 | Rd4  | 3.7 | 11.2 | 0.4  | -0.8 | 0.3  |
| Rd4 | Rd5  | 6.9 | 7.8  | -0.7 | -0.5 | -0.5 |
| Rd5 | R-ES | 7.9 | 95.7 | 0.4  | 0.6  | -0.7 |

### Intermediate domains

#### *Proposed trajectory*

|     |      |     |      |      |      |      |
|-----|------|-----|------|------|------|------|
| Apo | Rd3  | 5.8 | 29.4 | 0.3  | -0.6 | 0.7  |
| Rd3 | Rd4  | 3.4 | 11.3 | 0.1  | -0.5 | 0.9  |
| Rd4 | Rd5  | 4.2 | 10.9 | -0.2 | -0.2 | -0.9 |
| Rd5 | R-ES | 4.5 | 7.0  | -0.7 | 0.5  | -0.4 |

### Equatorial domains

#### *Proposed trajectory*

|     |     |     |     |      |     |     |
|-----|-----|-----|-----|------|-----|-----|
| Apo | Rd3 | 0.1 | 0.5 | -0.2 | 0.9 | 0.2 |
|-----|-----|-----|-----|------|-----|-----|

|     |      |  |     |      |  |      |      |      |
|-----|------|--|-----|------|--|------|------|------|
| Rd3 | Rd4  |  | 1.0 | 4.5  |  | 0.1  | -0.9 | 0.4  |
| Rd4 | Rd5  |  | 0.8 | 8.8  |  | -0.4 | -0.7 | 0.5  |
| Rd5 | R-ES |  | 1.2 | 13.6 |  | 0.2  | 0.9  | -0.4 |

**Table S2. Intersubunit contact distances (Å), related to Figures 4 and 5.**

A.

| Singly-bound top ring |      | GroEL-ATP <sub>7</sub> conformation |                 |         |      |  |
|-----------------------|------|-------------------------------------|-----------------|---------|------|--|
| Residues              | T    | RS <sub>1</sub>                     | RS <sub>2</sub> | RS-open | R-ES |  |
| <b>inter subunit</b>  |      |                                     |                 |         |      |  |
| Arg197-Cζ Glu386-Cδ   | 4.6  | 22.9                                | 23.5            | 32.1    | 34.8 |  |
| Lys80-Nζ Glu386-Cδ    | 17.8 | 4.0                                 | 5.3             | 11.0    | 7.9  |  |
| Glu255-Cδ Lys207-Nζ   | 4.0  | 17.5                                | 16.5            | 32.8    | 40.6 |  |
| Glu255-Cδ Lys245-Nζ   | 16.4 | 2.9                                 | 3.1             | 22.6    | 47.5 |  |
| <b>inter ring</b>     |      |                                     |                 |         |      |  |
| Glu461-Cδ Arg452-Cζ   | 5.2  | 4.7                                 | 4.6             | 6.0     | 4.4  |  |
| Ala109-Cβ Ala109-Cβ   | 3.6  | 6.6                                 | 6.4             | 6.6     | 7.3  |  |

B.

| Double-bound rings   |      | GroEL-ATP <sub>14</sub> conformation |                 |                 |                 |                 | RD-  | R-ES |
|----------------------|------|--------------------------------------|-----------------|-----------------|-----------------|-----------------|------|------|
| Residues             | T    | RD <sub>1</sub>                      | RD <sub>2</sub> | RD <sub>3</sub> | RD <sub>4</sub> | RD <sub>5</sub> | open |      |
| <b>inter subunit</b> |      |                                      |                 |                 |                 |                 |      |      |
| Arg197-Cζ Glu386-Cδ  | 4.6  | 19.3                                 | 26.4            | 26.9            | 25.6            | 28.0            | 35.6 | 34.8 |
| Lys80-Nζ Glu386-Cδ   | 17.8 | 11.8                                 | 12.3            | 9.8             | 9.7             | 13.2            | 11.3 | 7.9  |
| Glu255-Cδ Lys207-Nζ  | 4.0  | 16.2                                 | 18.5            | 21.9            | 20.4            | 22.6            | 37.9 | 40.6 |
| Glu255-Cδ Lys245-Nζ  | 16.4 | 6.5                                  | 3.8             | 9.1             | 7.7             | 3.3             | 26.4 | 47.5 |
| Glu257-Cδ Lys245-Nζ  | 17.5 | 8.4                                  | 3.4             | 3.0             | 3.1             | 7.0             | 27.4 | 51.8 |
| Glu257-Cδ Lys242-Nζ  | 21.5 | 18.6                                 | 15.7            | 14.6            | 14.9            | 3.0             | 21.2 | 44.9 |
| <b>inter ring</b>    |      |                                      |                 |                 |                 |                 |      |      |
| Glu461-Cδ Arg452-Cζ  | 5.2  | 5.9                                  | 4.0             | 5.9             | 4.0             | 4.6             | 4.6  | 4.4  |
| Ala109-Cβ Ala109-Cβ  | 3.6  | 6.8                                  | 7.8             | 6.8             | 7.8             | 8.6             | 8.6  | 7.3  |
