# Supplementary material for: ATP-Triggered Conformational Changes Delineate Substrate-Binding and -Folding Mechanics of the GroEL Chaperonin
Source: PubMed Central journal article supplement (PMC3326522; doi:10.1016/j.cell.2012.02.047), 2012-03-30

# Movie S1

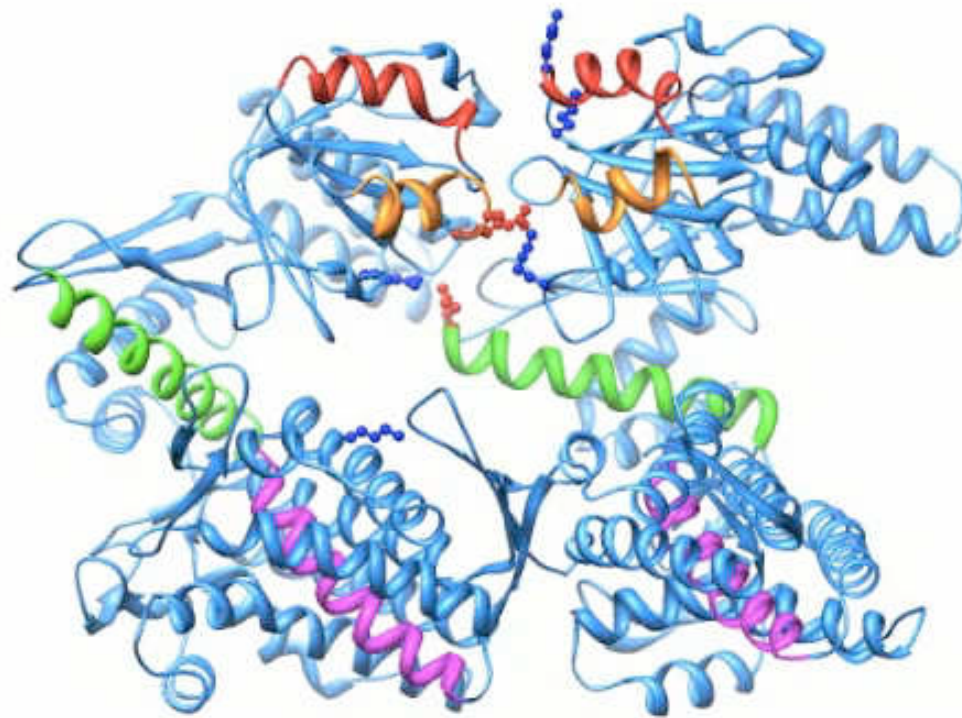

# Movie S2

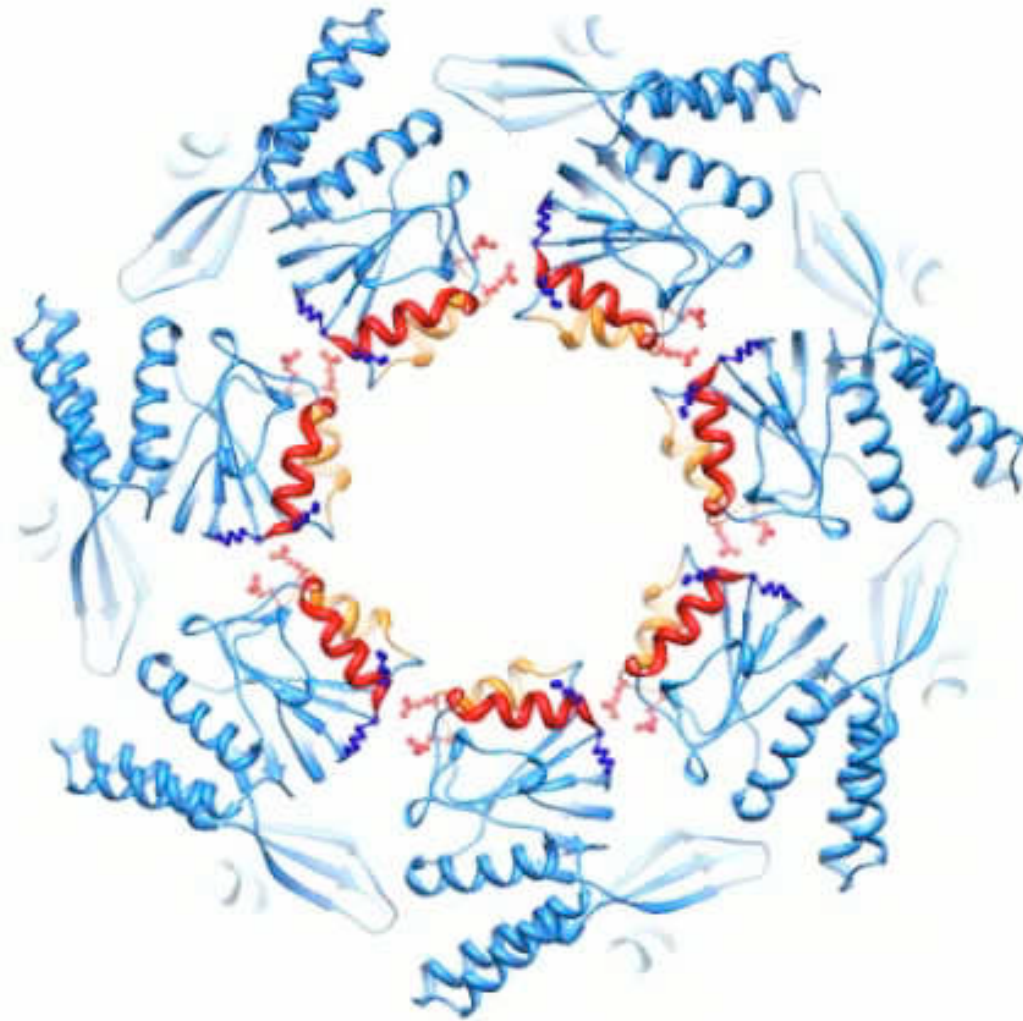

Supplement: mmc2.pdf [file mmc2.pdf]
