# Supplementary material for: ATP-Triggered Conformational Changes Delineate Substrate-Binding and -Folding Mechanics of the GroEL Chaperonin
Source: PubMed Central journal article supplement (PMC3326522; doi:10.1016/j.cell.2012.02.047), 2012-03-30

# Movie S3

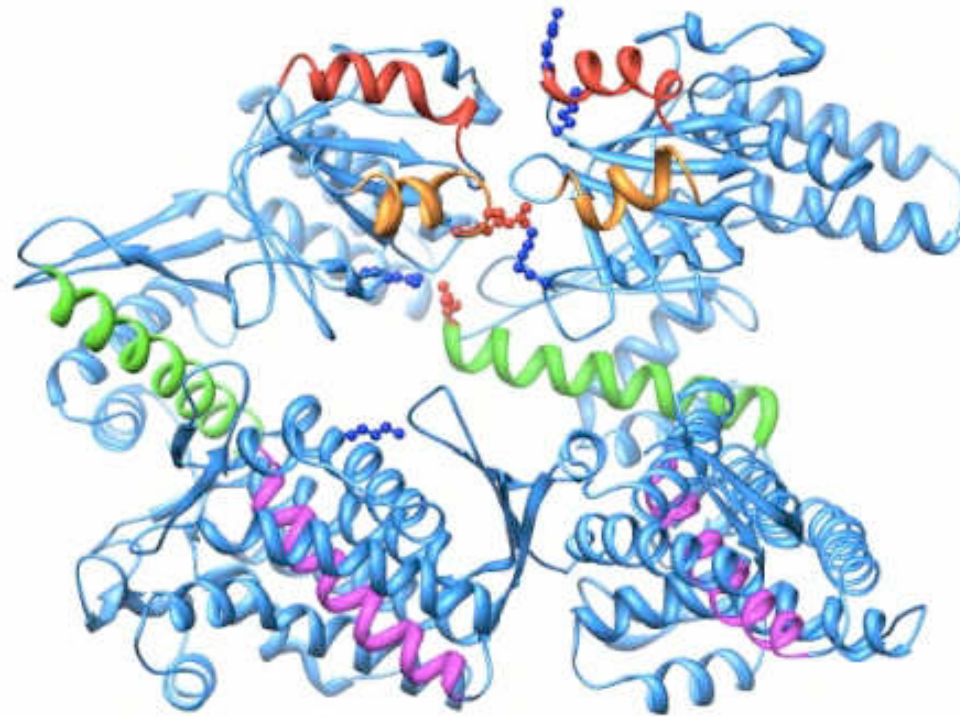

# Movie S4

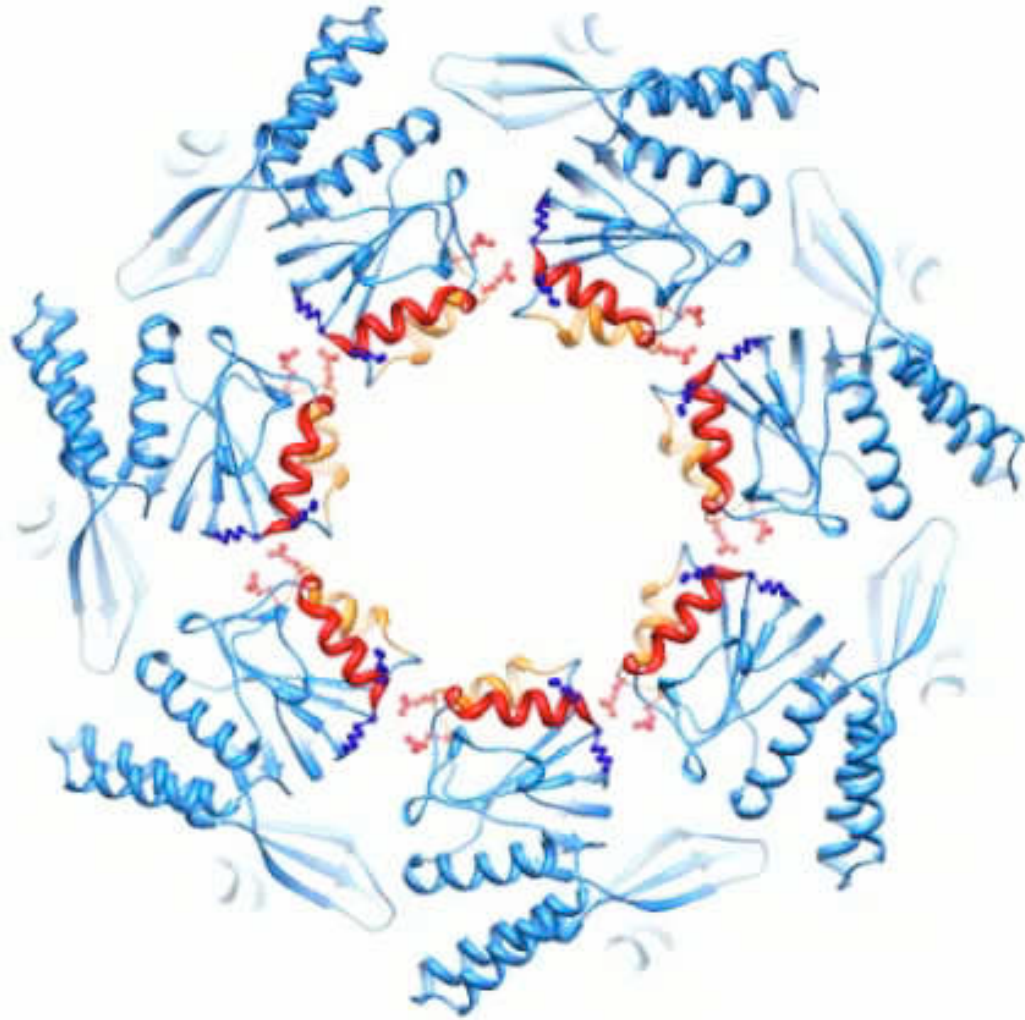

Supplement: mmc3.pdf [file mmc3.pdf]
