# Supplementary material for: ATP-Triggered Conformational Changes Delineate Substrate-Binding and -Folding Mechanics of the GroEL Chaperonin
Source: PubMed Central journal article supplement (PMC3326522; doi:10.1016/j.cell.2012.02.047), 2012-03-30

# Movie S5

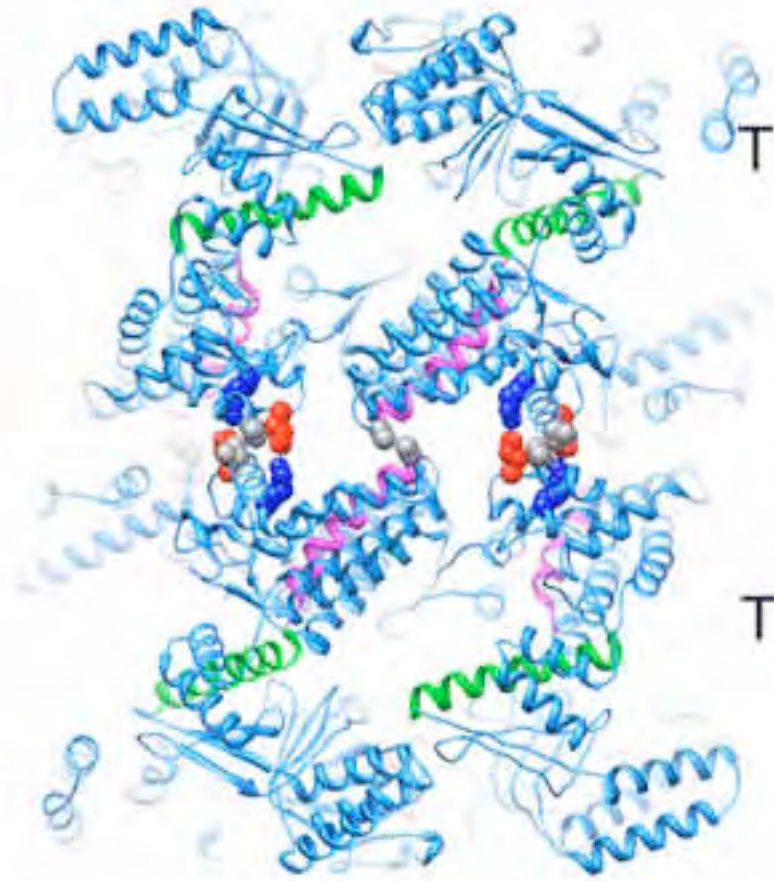

# Movie S6

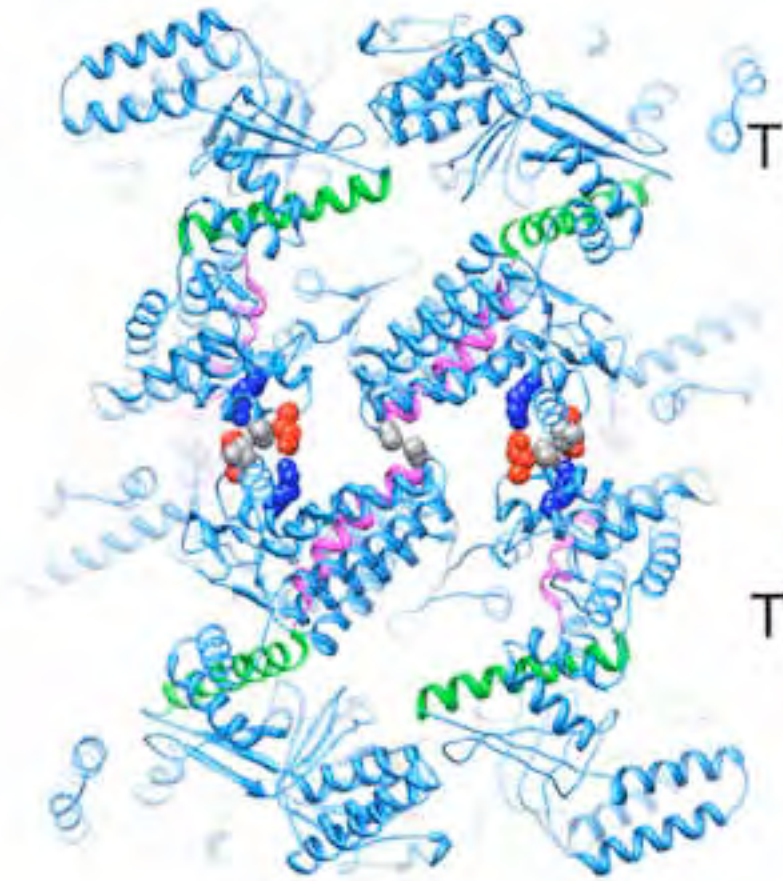

# Movie S7

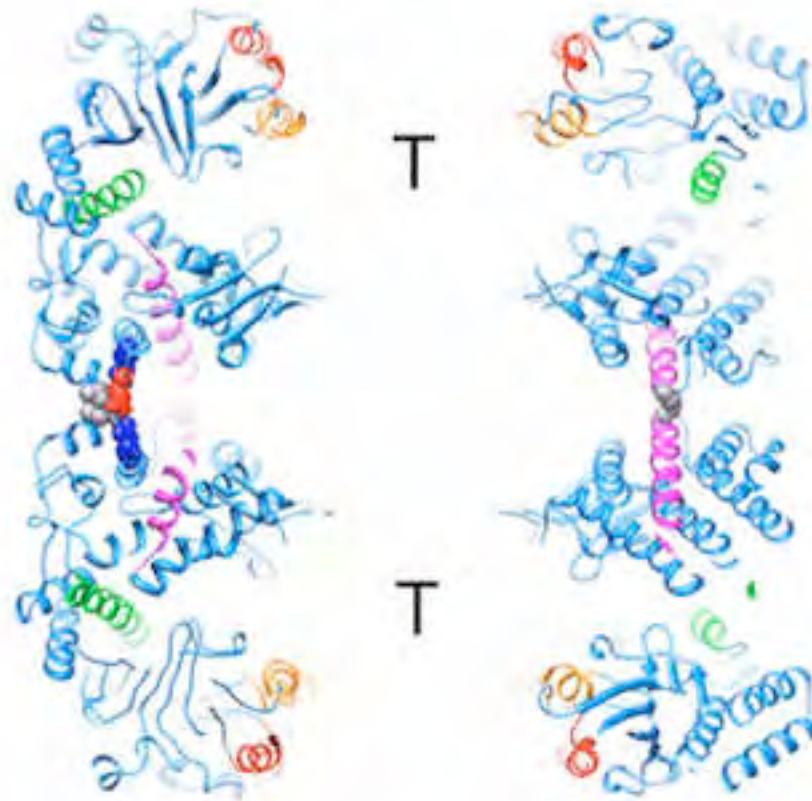

# Movie S8

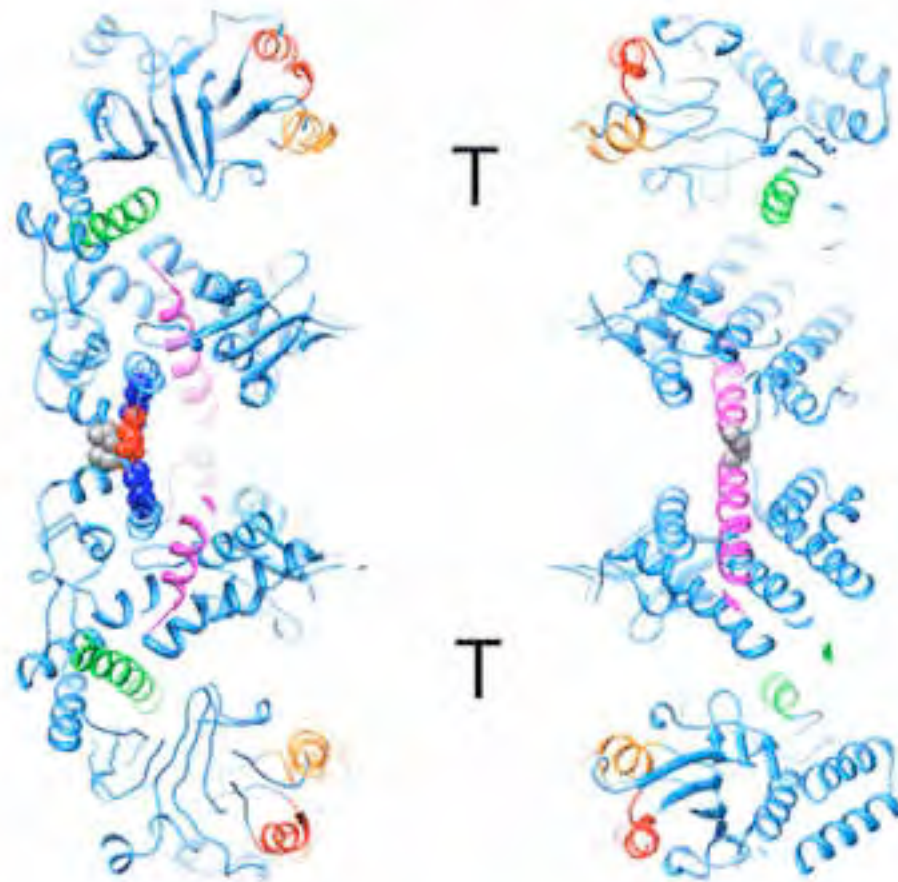

Supplement: mmc4.pdf [file mmc4.pdf]
